# Supplementary material for: The N-terminal dimerization is required for TDP-43 splicing activity
Source: PubMed Central journal article supplement (PMC5522446; doi:10.1038/s41598-017-06263-3), 2017-07-21
Supplement: 41598_2017_6263_MOESM1_ESM.pdf [file 41598_2017_6263_MOESM1_ESM.pdf]

## The N-terminal dimerization is required for TDP-43 splicing activity

Lei-Lei Jiang<sup>1</sup>, Wei Xue<sup>1</sup>, Jun-Ye Hong<sup>1</sup>, Jun-Ting Zhang<sup>2</sup>, Min-Jun Li<sup>3</sup>, Shao-Ning Yu<sup>2</sup>, Jian-Hua He<sup>3</sup>, and Hong-Yu Hu<sup>1</sup>

<sup>1</sup> State Key Laboratory of Molecular Biology, CAS Center for Excellence in Molecular Cell Science, Shanghai Institute of Biochemistry and Cell Biology, Chinese Academy of Sciences; University of Chinese Academy of Sciences, 320 Yueyang Road, Shanghai 200031, P. R. China.

<sup>2</sup> Department of Chemistry, Fudan University, 220 Handan Road, Shanghai 200433, P. R. China.

<sup>3</sup> Shanghai Institute of Applied Physics, Chinese Academy of Sciences, 239 Zhangheng Road, Shanghai 201204, P. R. China.

Correspondence and requests for materials should be addressed to H.-Y H. (email: [hyhu@sibcb.ac.cn](mailto:hyhu@sibcb.ac.cn)).

SUBJECT AREAS: MECHANISMS OF DISEASES; PROTEIN AGGREGATION

**Running title:** Structure and function of TDP-43 N-terminus

**Figure S1**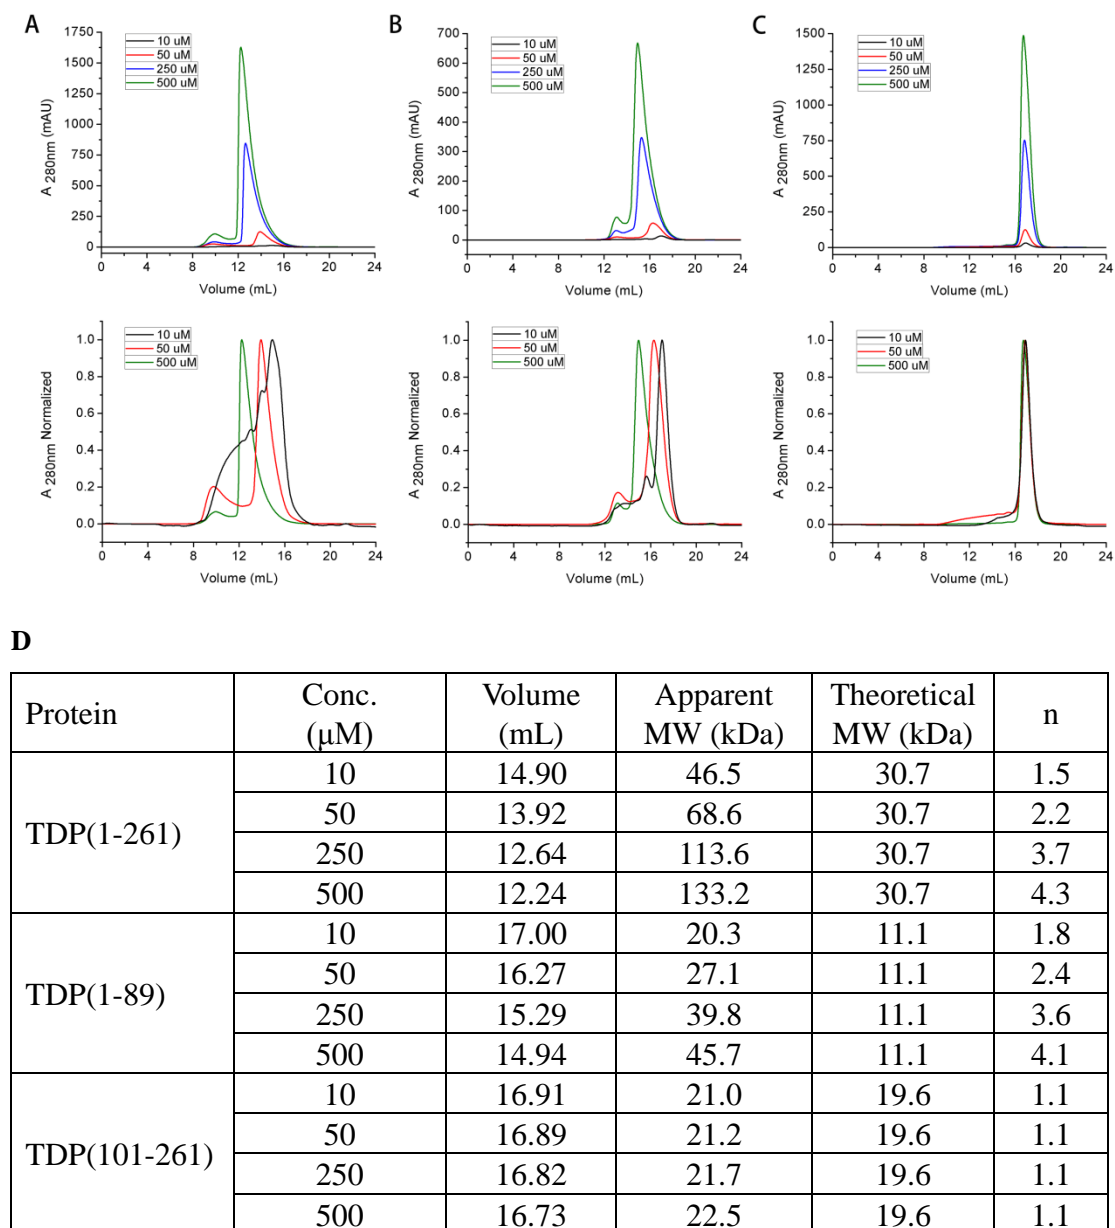

**Figure S1. SEC characterization of the oligomeric states of the N-terminal fragments from TDP-43.** (A) SEC profiles for TDP(1-261) at different concentrations. (B) TDP(1-89). (C) TDP(101-261). The down panels show the normalized chromatograms. The proteins were diluted to different concentrations with Buffer A and analyzed using a Superdex-200 Increase 10/30 GL column. (D) Data from the SEC experiments (A - C) on the apparent MWs and their stoichiometries (n). Conc., concentration.

**Figure S2**

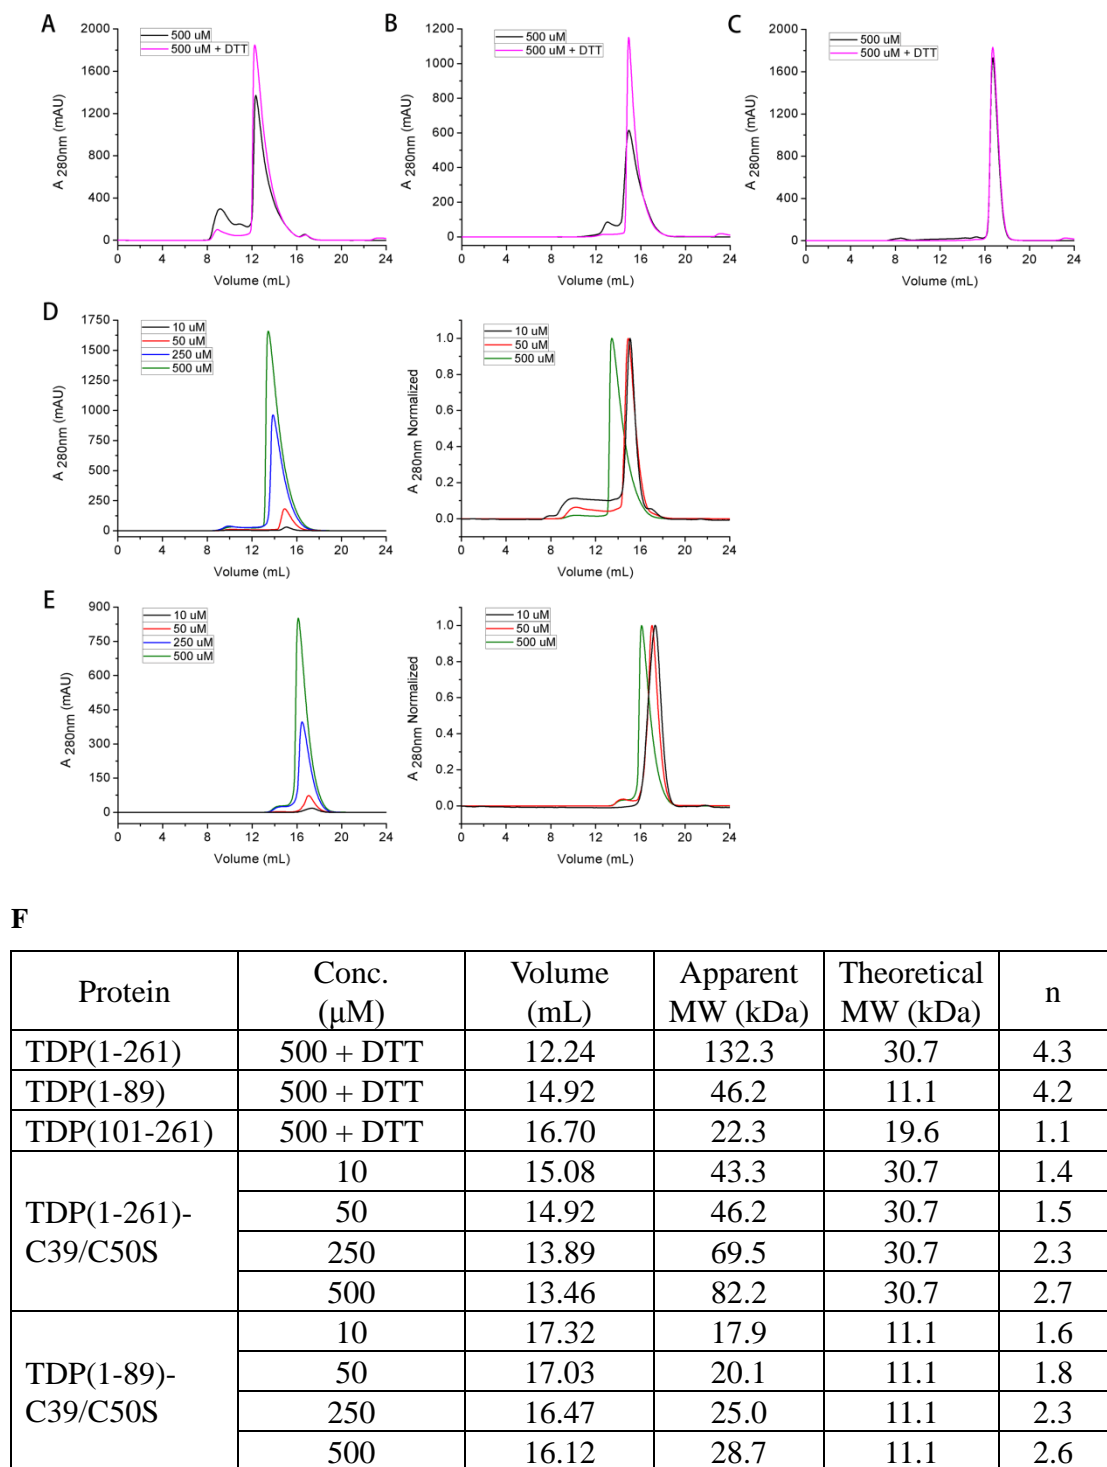

**Figure S2. Role of the Cys residues in the oligomeric states of the N-terminal fragments as characterized by SEC.** (A) SEC profiles of TDP(1-261) with or without 5 mM DTT. The protein concentration was 500 μM in Buffer A, and the

experiment was performed using a Superdex-200 Increase 10/30 GL column equilibrated with Buffer A. (B) As in (A), TDP(1-89). (C) As in (A), TDP(101-261). (D) SEC profiles of TDP(1-261)-C39/C50S at different concentrations. The right panels show the normalized chromatograms. The experiment was carried out using a Superdex-200 Increase 10/30 GL column. (E) As in (D), TDP(1-89)-C39/C50S. (F) Data from the SEC experiments (A - E) on the apparent MWs and their stoichiometries ( $n$ ). Conc., concentration.

**Figure S3**

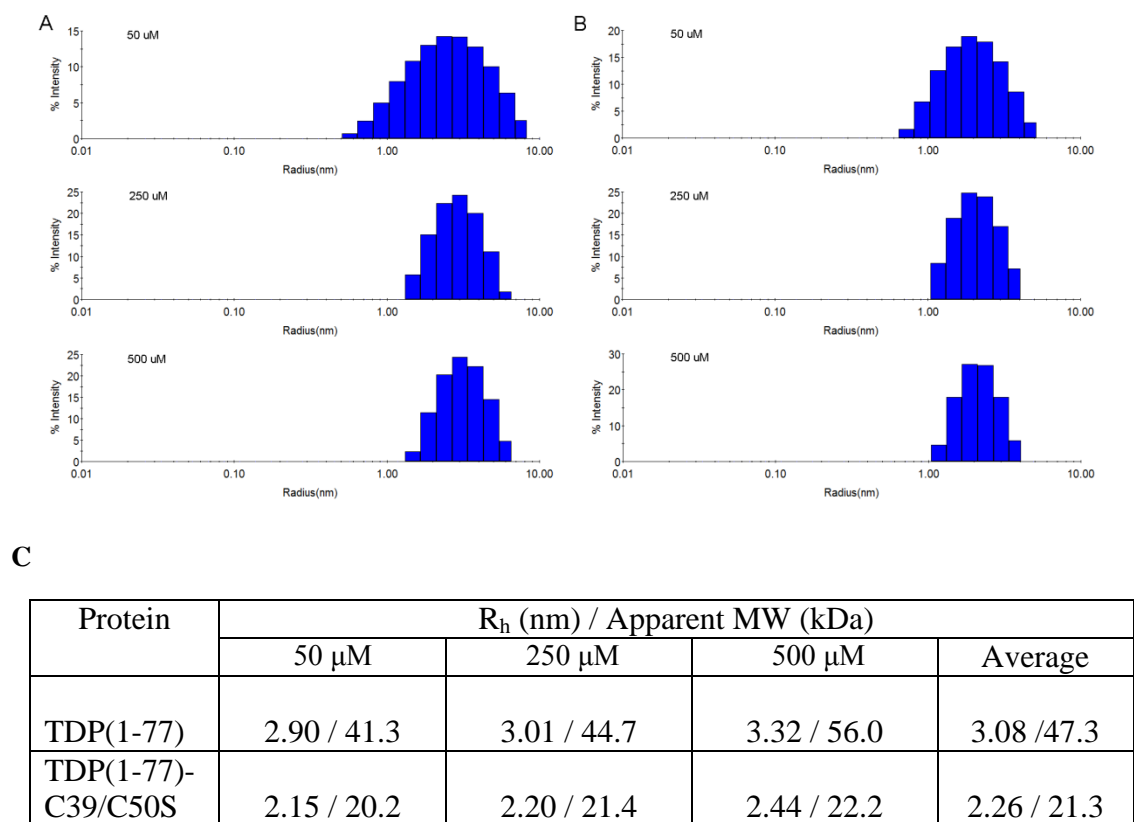

**Figure S3. DLS analysis of the sizes and size distribution of TDP(1-77) and its Cys mutant.** (A) TDP(1-77). (B) TDP(1-77)-C39/C50S. The protein was diluted with Buffer A to different concentrations, and the hydrodynamic radius ( $R_h$ ) and apparent MW were calculated. (C) Data from the DLS experiments (A, B) on the hydrodynamic radii ( $R_h$ ) and apparent MWs.

**Figure S4**

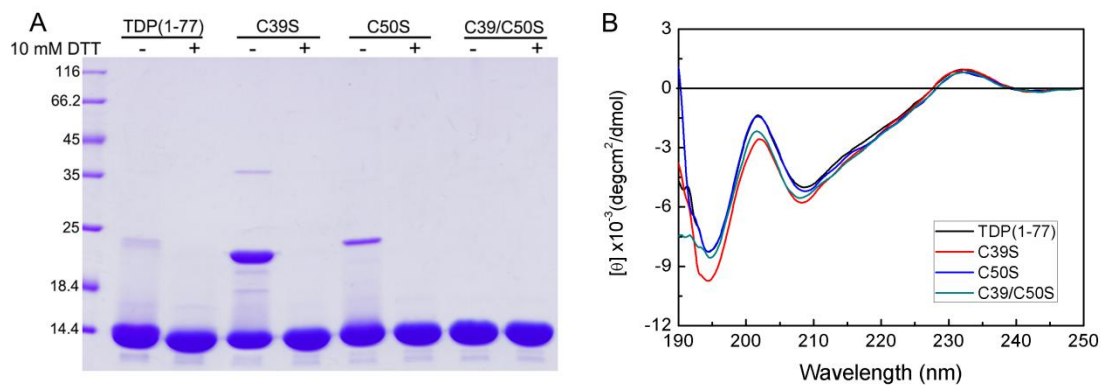

**Figure S4. Effects of Cys mutations on the oligomeric states and secondary structures of TDP(1-77).** (A) SDS-PAGE of TDP(1-77) and its Cys mutants with Coomassie blue staining. Each protein (500  $\mu$ M in Buffer A) was treated with or without 10 mM DTT. (B) CD spectra of TDP(1-77) and its Cys mutants. The protein concentrations were 0.24 mg/mL in Buffer A.

**Figure S5**

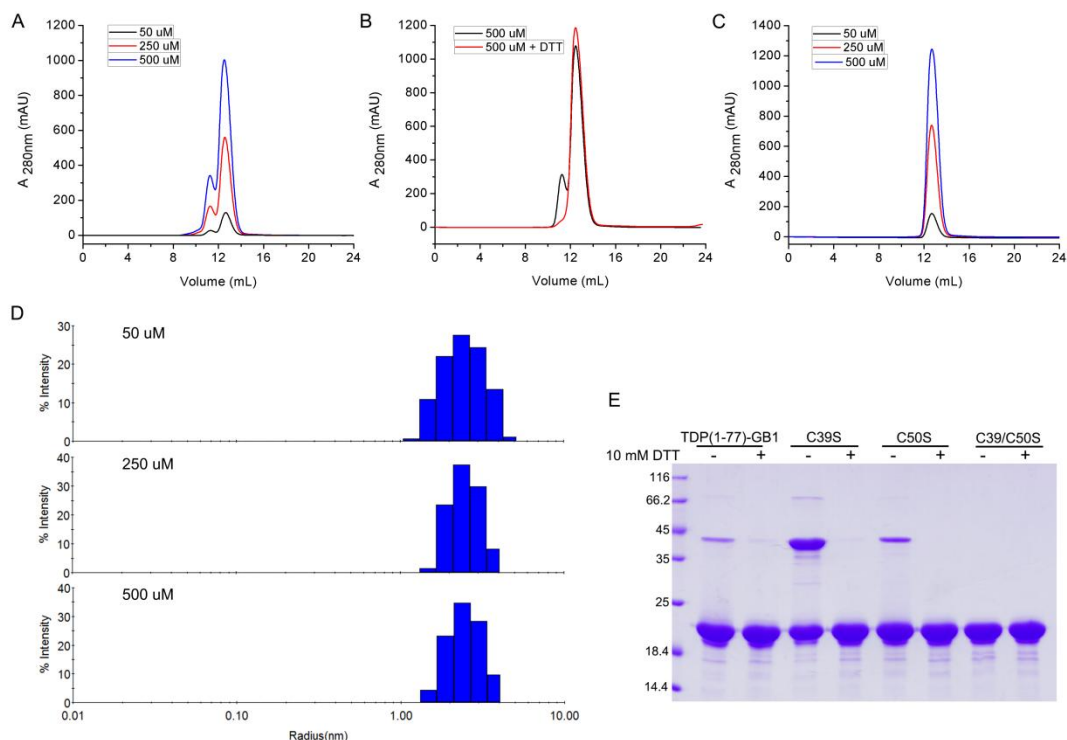

**F**

| Conc.                    | 50 $\mu\text{M}$ | 250 $\mu\text{M}$ | 500 $\mu\text{M}$ | Average     |
|--------------------------|------------------|-------------------|-------------------|-------------|
| $R_h$ / MW<br>(nm / kDa) | 2.57 / 30.7      | 2.57 / 30.7       | 2.55 / 30.0       | 2.56 / 30.5 |

**Figure S5. Characterization of the oligomeric states of GB1-fused TDP(1-77) and its Cys mutant.** (A) SEC profiles of TDP(1-77)-GB1 at different concentrations. The protein was diluted with Buffer A to different concentrations and loaded onto a Superdex-75 10/30 GL column. (B) TDP(1-77)-GB1 with or without 5 mM DTT. (C) As in (A), TDP(1-77)-GB1-C39/C50S. (D) DLS analysis of TDP(1-77)-GB1-C39/C50S. (E) SDS-PAGE analysis of TDP(1-77)-GB1 and its Cys mutants. Each protein (500  $\mu\text{M}$  in Buffer A) was treated with or without 10 mM DTT. (F) Data from the DLS measurements (D) on the hydrodynamic radii ( $R_h$ ) and apparent MWs for TDP(1-77)-GB1-C39/C50S. Conc., concentration.

**Table S1**

|                                              |                       |
|----------------------------------------------|-----------------------|
| Number of experimental restraints            | TDP(1-77)-GB1-C39C50S |
| Total unambiguous distance restraints        | 829                   |
| Intra residual                               | 447                   |
| Sequential ( $ i - j  = 1$ )                 | 176                   |
| Medium range ( $2 \leq  i - j  \leq 4$ )     | 84                    |
| Long range ( $ i - j  \geq 5$ )              | 122                   |
| Hydrogen bond restraints                     | 38                    |
| Dihedral angle restraints                    |                       |
| $\varphi$ :                                  | 65                    |
| $\psi$ :                                     | 64                    |
| Structure statistics                         |                       |
| RMSD from experimental restraints            |                       |
| NOE distances ( $\text{\AA}$ )               | 0.179 $\pm$ 0.022     |
| Dihedral angles (deg.)                       | 2.706 $\pm$ 0.161     |
| RMSD from idealized geometry                 |                       |
| Bonds ( $\text{\AA}$ )                       | 0.008 $\pm$ 0.000     |
| Angles (deg.)                                | 0.968 $\pm$ 0.032     |
| Improper (deg.)                              | 3.026 $\pm$ 0.184     |
| Ramachandran analysis                        |                       |
| Residues in most favored regions (%)         | 75.1                  |
| Residues in additionally allowed regions (%) | 16.0                  |
| Residues in generously allowed regions (%)   | 6.1                   |
| Residues in disallowed regions (%)           | 2.9                   |
| Average atomic RMSDs                         |                       |
| All residues                                 |                       |
| Backbone atoms ( $\text{\AA}$ )              | 0.94 $\pm$ 0.21       |
| Heavy atoms ( $\text{\AA}$ )                 | 1.51 $\pm$ 0.25       |

**Table S1. NMR experimental restraints and structural statistics for TDP(1-77)-GB1-C39C50S.** The average atomic RMSD is defined from the 10 final structures.



**Figure S6**

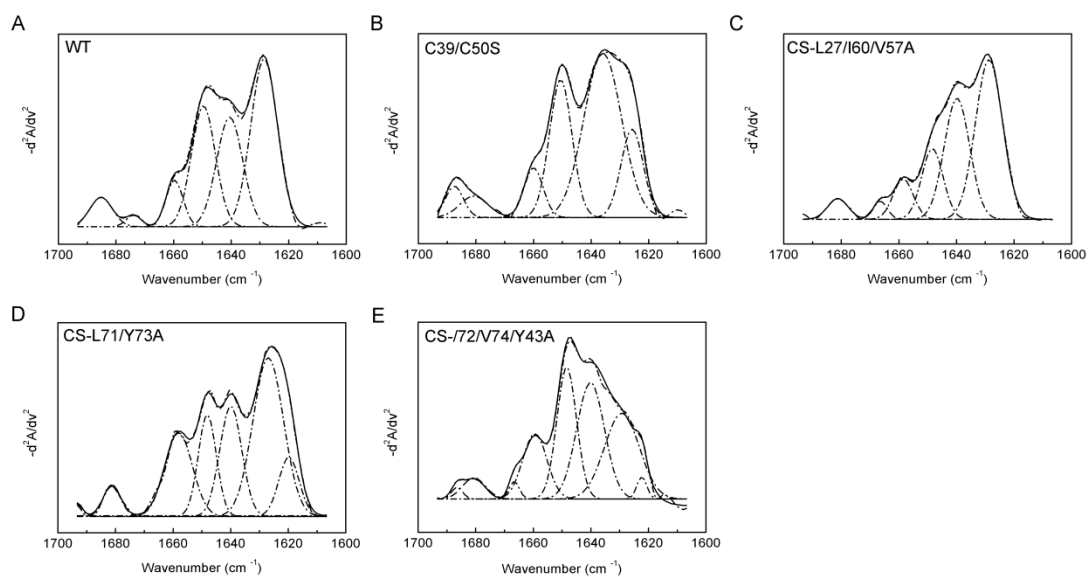

**F**

| TDP(1-77)       | $\beta$ -sheet (%) | $\alpha$ -helix (%) | $\beta$ -turn (%) | Random (%) |
|-----------------|--------------------|---------------------|-------------------|------------|
| Wild-type       | 62                 | 7                   | 7                 | 24         |
| C39/C50S        | 61                 | 9                   | 7                 | 23         |
| CS-L71/Y73A     | 63                 | 17                  | 4                 | 14         |
| CS-V72/V74/Y43A | 56                 | 14                  | 7                 | 23         |
| CS-L27/I60/V57A | 71                 | 8                   | 6                 | 14         |

**Figure S6. FT-IR analysis of TDP(1-77) and its mutants for estimating secondary structures.** (A) Curve-fitting analysis of the inverted second-derivative amide I spectrum for wild-type TDP(1-77). (B) C39/C50S. (C) C39/C50S-L27/I60/V57A. (D) C39/C50S-L71/Y73A. (E) C39/C50S-V72/V74/Y43A. (F) Secondary structure contents of TDP(1-77) and its various mutants. The secondary structure contents were estimated from the FT-IR spectra (A - E) by curve-fitting analysis.

**Figure S7**

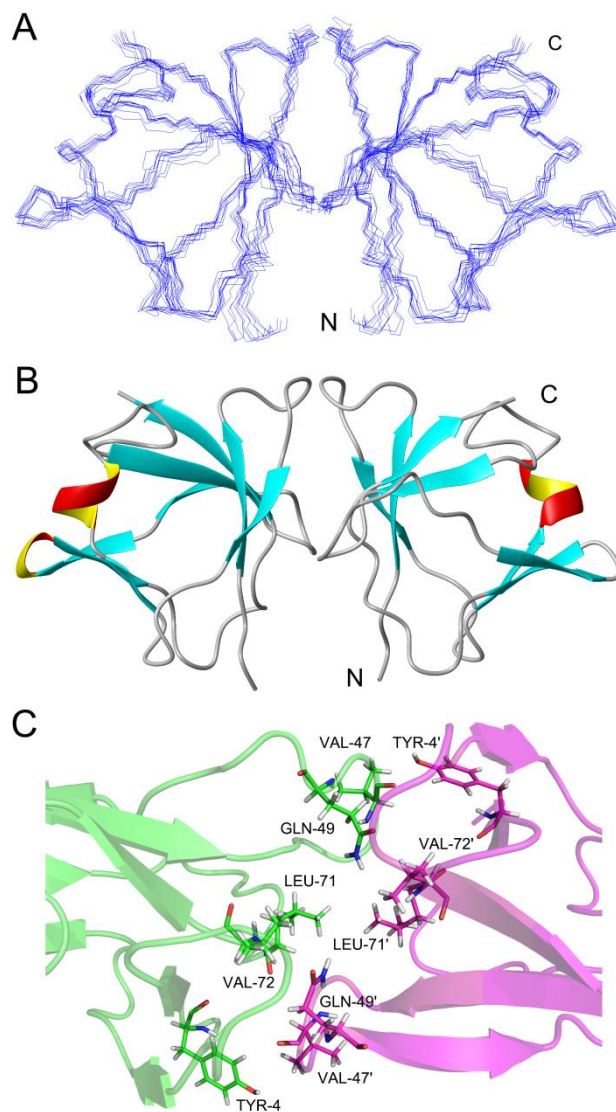

**Figure S7. Structural model of the TDP-43 NTD dimer.** The model shows the dimer interfaces centered at Leu71 and Val72 around the  $\beta$ 7-strand. The structure was analyzed by using the HADDOCK program with the active residues from mutagenesis and SEC experiments.
